# Supplementary material for: Characteristics and function of a novel cystatin gene in the pine wood nematode Bursaphelenchus xylophilus
Source: PubMed Central journal article supplement (PMC6777362; doi:10.1242/bio.042655), 2019-09-11
Supplement: biolopen-8-042655-s1.pdf [file biolopen-8-042655-s1.pdf]

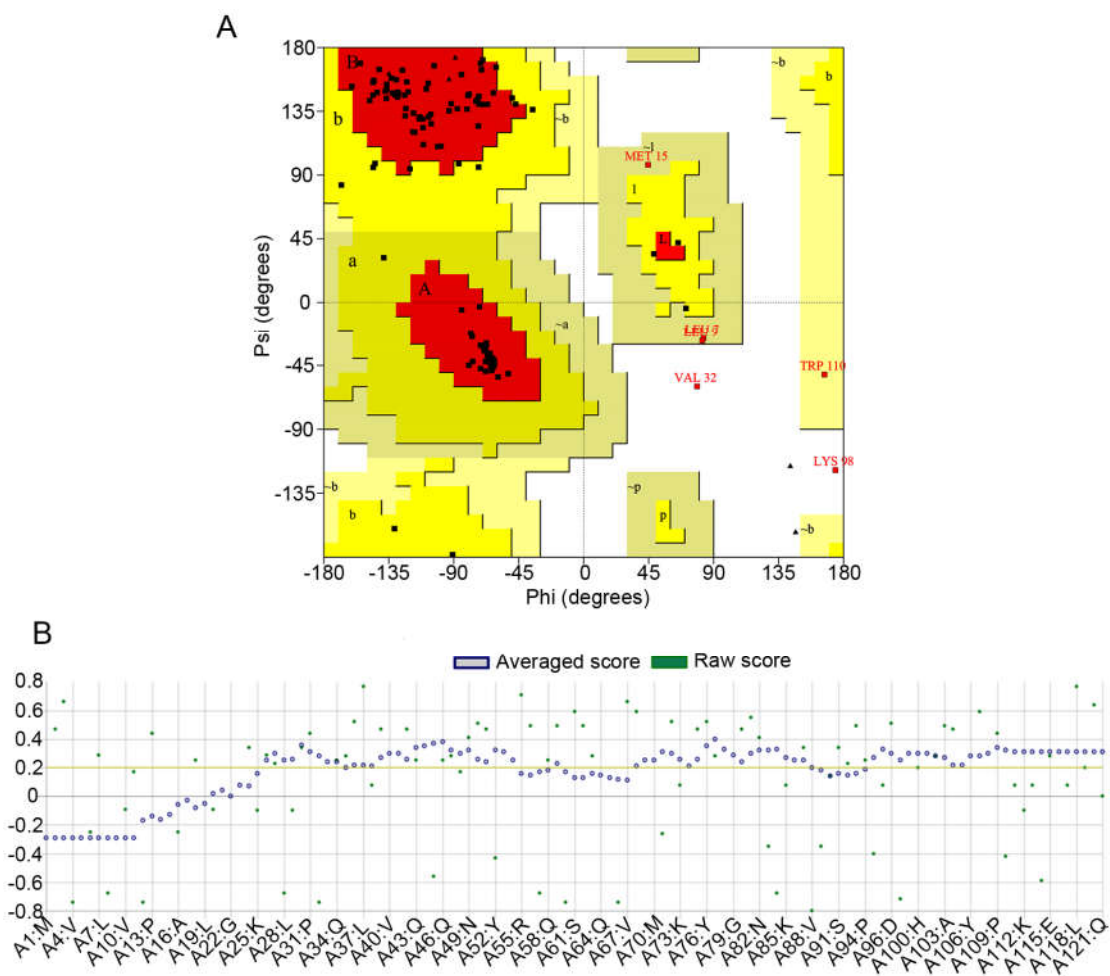

**Fig. s1. The predicted 3D structure assessment of Bx-CPI-1.** Laplace image (Ramachandran Plot) of 3D structure of Bx-CPI-1 (**A**). Residues in most favoured regions [A,B,L] are 88 (81.5%); Residues in additional allowed regions [a,b,l,p] are 14 (13.0%); Residues in generously allowed regions [ $\sim$ a, $\sim$ b, $\sim$ l, $\sim$ p] are 4 (3.7%); Residues in disallowed regions are 2 (1.9%). Number of non-glycine and non-proline residues is 108; Number of end-residues (excl. Gly and Pro) is 2; Number of glycine residues (shown as triangles) is 6; Number of proline residues is 5. Total number of residues is 121. Verify 3D model of Bx-CPI-1 (**B**). The 66.99% of the residues have averaged 3D-1D score  $\geq$  0.2.

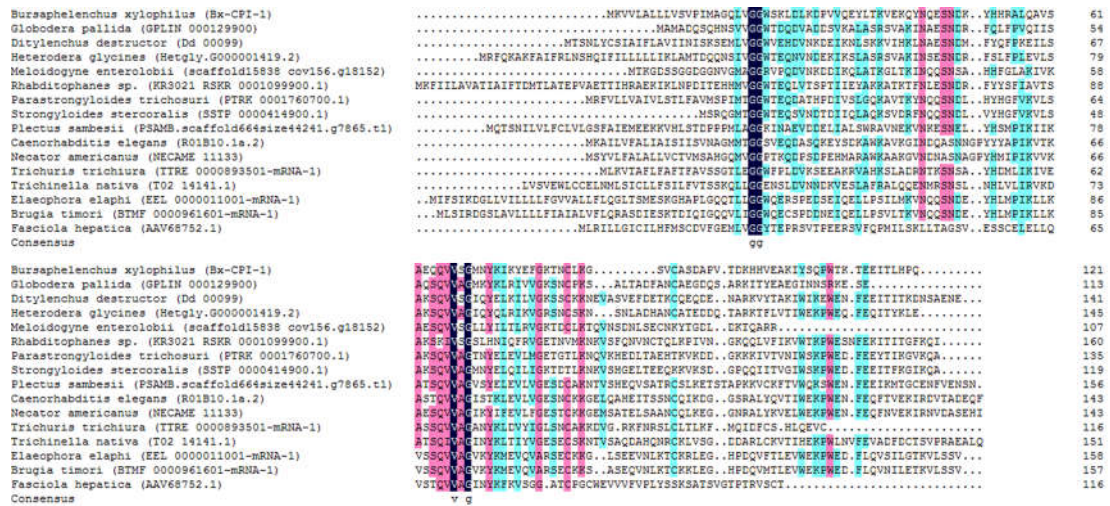

**Fig. S2. Multiple alignments of predicted Bx-CPI-1 protein sequence of *B. xylophilus* with other 15 cystatins.** Letters in black boxes, red boxes, and blue boxes indicate invariant amino acid residues, highly conserved amino acid residues, and moderately conserved amino acid residues, respectively, among the CPI proteins.

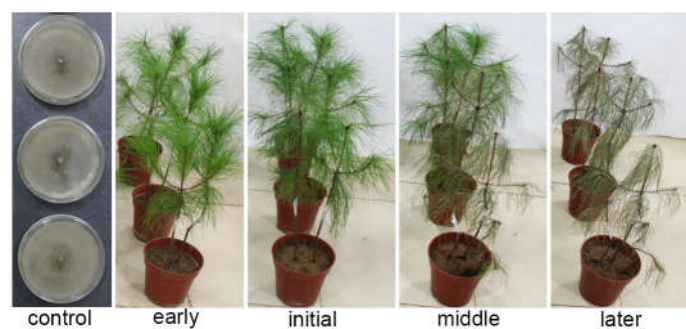

**Fig. S3. Symptoms in *P. massoniana* after inoculation with *B. xylophilus*.** Each seedling was inoculated with about 10,000 nematodes. The early stage of PWD (early); the initial stage of PWD (initial); the middle stage of PWD (middle); the later stage of PWD (later); the nematodes cultured on *B. cinerea* (control).

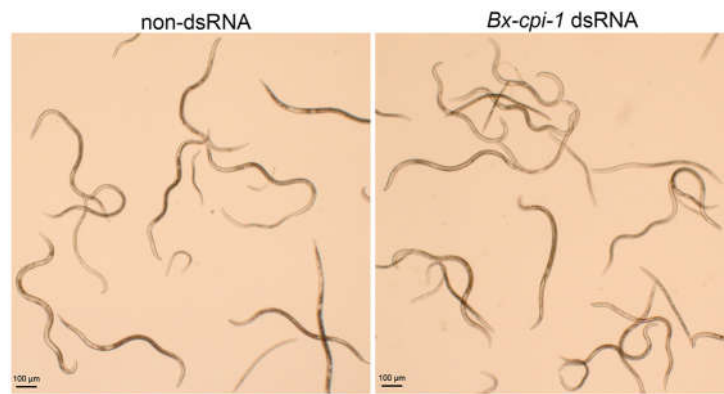

**Fig. S4.** Morphology of *B. xylophilus* after soaking in dsRNA (non-dsRNA and *Bx-cpi-1* dsRNA) for 48 h. Scale bars = 100 μm.

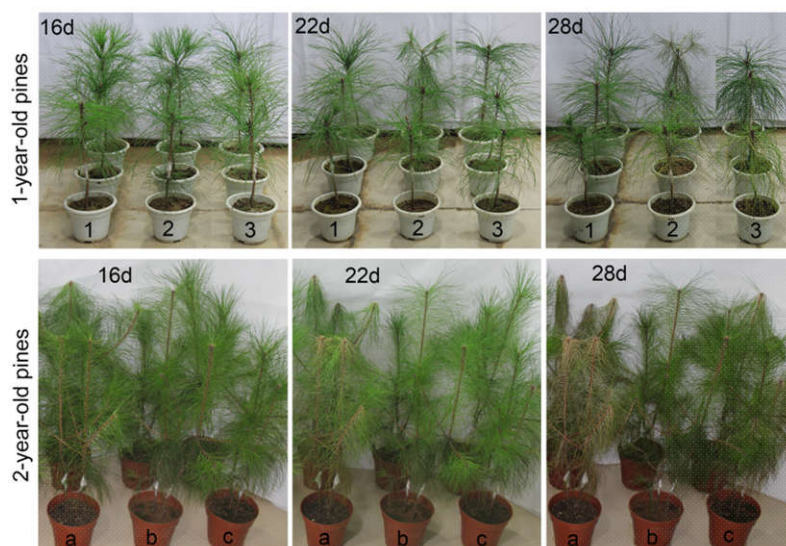

**Fig. S5. Symptoms in *P. massoniana* after inoculation with *B. xylophilus*.** The 1-year-old pines inoculated with 500 nematodes, and 2-year-old pines inoculated with 1,500 nematodes. Photographs shows the symptoms at 16d, 22d and 28d. Within each photograph, pot 1 and b indicates pines inoculated with ddH<sub>2</sub>O, pot 2 and a indicates pines inoculated with *B. xylophilus* soaked in non-dsRNA, and pot 3 and c indicates pines inoculated with *B. xylophilus* soaked in *Bx-cpi-1* dsRNA.

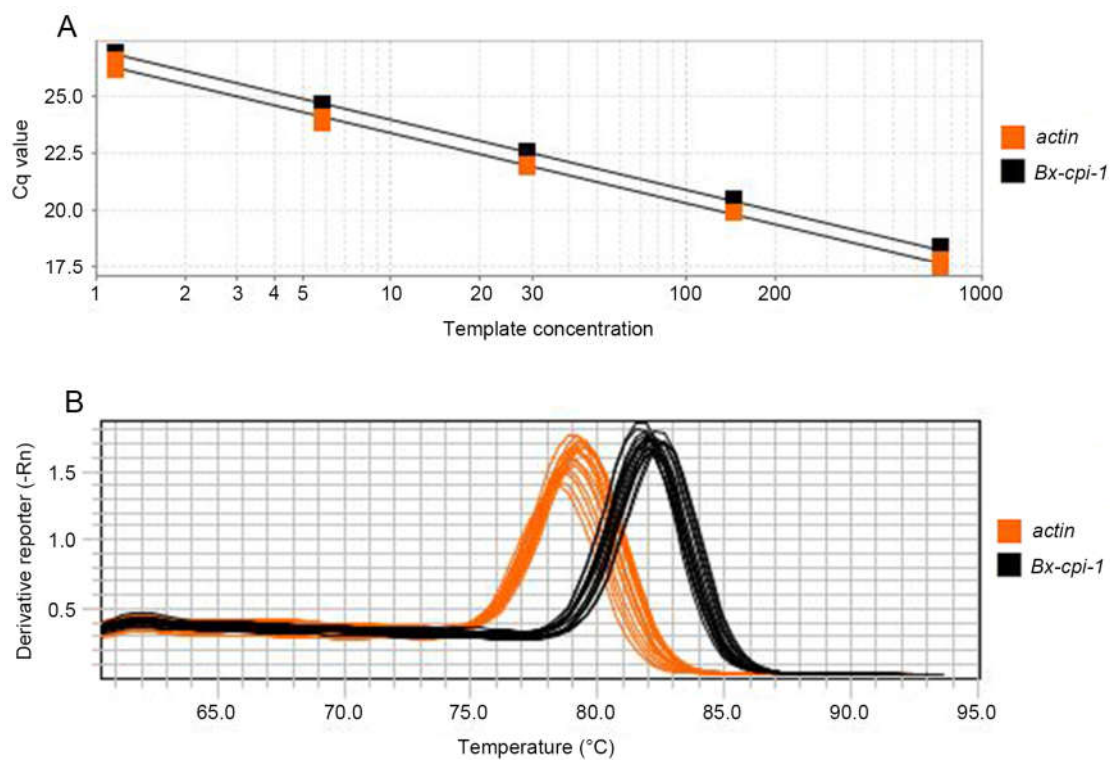

**Fig. S6. The standard curve and melt curve of *actin* and *Bx-cpi-1*.** The standard curve of *actin* and *Bx-cpi-1* (A). Cq value is proportional to template cDNA concentration. The slope of *actin* and *Bx-cpi-1* was -3.058 and -3.071, the correlation coefficient ( $R^2$ ) of *actin* and *Bx-cpi-1* was 0.998 and 0.999, the amplification efficiency of *actin* and *Bx-cpi-1* was 112.356% and 111.659%. The melt curve of *actin* and *Bx-cpi-1* (B).
